# Supplementary material
Source: HighWire-hosted journal article supplement (https://erj.ersjournals.com/content/49/5/1601526)
Supplement: inline-supplementary-material-1 [file inline-supplementary-material-1.pdf]

## **APPENDIX A:**

### **Pubmed Literature Search Strategy**

The following search strategy was used in PubMed and a similar strategy was used in Embase:

((("mannitol/diagnostic use"[mesh] or "adenosine/diagnostic use"[mesh] or "saline solution, hypertonic/diagnostic use"[mesh] or "methacholine chloride/diagnostic use"[mesh] or "histamine/diagnostic use"[mesh] or "allergens/diagnostic use"[mesh]) or "bronchoconstrictor agents/diagnostic use"[mesh])) and (("occupational diseases/diagnosis"[mesh:noexp] or "asthma/diagnosis"[mesh] or "pulmonary disease, chronic obstructive/diagnosis"[mesh] or "bronchial hyperreactivity/diagnosis"[mesh] or "respiratory hypersensitivity/diagnosis"[mesh:noexp])) or ("exercise test"[mesh] and "bronchial provocation tests"[mesh]) or ("bronchial provocation tests/methods"[mesh major topic]) and ("humans"[mesh terms] and (english[lang] or french[lang] or german[lang] or danish[lang] or dutch[lang])))
