# Supplementary material
Source: HighWire-hosted journal article supplement (https://erj.ersjournals.com/content/49/5/1601526)
Supplement: inline-supplementary-material-2 [file inline-supplementary-material-2.pdf]

## APPENDIX B:

### Sample Methacholine Challenge Pre-Test Questionnaire

First Name: \_\_\_\_\_ Last Name: \_\_\_\_\_

Date of Birth: \_\_\_\_\_

Medical Record or ID Number: \_\_\_\_\_

1. List all medications you have taken in the last 3 days for asthma, hay fever, heart disease, blood pressure, allergies, or stomach problems, and the number of hours or days since your last dose for each medication.

| Name of Medication | Date and time of last treatment |
|--------------------|---------------------------------|
| _____              | _____                           |
| _____              | _____                           |
| _____              | _____                           |
| _____              | _____                           |
| _____              | _____                           |
| _____              | _____                           |

- |                                                                                                            |       |    |
|------------------------------------------------------------------------------------------------------------|-------|----|
| 2. Has a physician told you that you have asthma?                                                          | Yes   | No |
| 3. Have you ever been hospitalized for asthma?                                                             | Yes   | No |
| 4. Did you have recurrent episodes of cough and wheezing or lung infections as a child?                    | Yes   | No |
| 5. Have you experienced asthma symptoms such as wheezing or shortness of breath within the last two weeks? | Yes   | No |
| 6. If you are a smoker, when did you last smoke?                                                           | _____ |    |
| 7. Have you had a respiratory infection in the last 6 weeks?                                               | Yes   | No |
| 8. Have you had a heart attack or stroke within the last 3 months?                                         | Yes   | No |
| 9. Do you have high blood pressure?                                                                        | Yes   | No |
| 10. Do you have an aortic aneurysm?                                                                        | Yes   | No |
| 11. Have you had recent eye surgery?                                                                       | Yes   | No |
| 12. Are you pregnant or nursing?                                                                           | Yes   | No |
