# Supplementary material
Source: HighWire-hosted journal article supplement (https://erj.ersjournals.com/content/49/5/1601526)
Supplement: inline-supplementary-material-5 [file inline-supplementary-material-5.pdf]

## APPENDIX E:

### Example Calculation of PD<sub>20</sub>

The equations of Sterk et al[1], Juniper et al[2] and Cockcroft et al[3] to calculate the interpolated PC<sub>20</sub> can be adapted to the calculation of PD<sub>20</sub>;

where

- D<sub>1</sub> = the dose at the second to last methacholine step  
(ie, step preceding the final step)
- D<sub>2</sub> = the dose at the final methacholine step  
(ie, step resulting in a 20% or greater fall in FEV<sub>1</sub>)
- R<sub>1</sub> = % fall in FEV<sub>1</sub> after D<sub>1</sub>
- R<sub>2</sub> = % fall in FEV<sub>1</sub> after D<sub>2</sub>

$$PD_{20} = \text{antilog} \left[ \log D_1 + \frac{[(\log D_2 - \log D_1)(20 - R_1)]}{(R_2 - R_1)} \right]$$

The lung delivered dose is based on the nebulizer output characteristics and the duration of inhalation at each concentration.

$$\text{Dose} = \text{rate of output} \times \text{respirable fraction} \times \text{duration of inhalation} \times T_i/T_{\text{tot}}$$

Where respirable fraction is that of the aerosol carried in particles less than 5 µm and T<sub>i</sub>/T<sub>tot</sub> is the respiratory duty cycle assumed to be 0.4[4]

Exponential models are better than linear models for interpolating between concentrations or doses[5].

Example of calculations:

In the test data shown graphically below, the FEV<sub>1</sub> fell 13% (R<sub>1</sub>) at a concentration step of 0.25 mg/mL and 28% (R<sub>2</sub>) at a concentration of 0.5 mg/mL

If the dosing protocol used is known to deliver 16 µg at a concentration of 0.25 mg/mL and 32 µg at 0.5 mg/mL, then D<sub>1</sub>=16 and D<sub>2</sub>=32

$$PD_{20} = \text{antilog} \left[ \log 16 + \frac{[(\log 32 - \log 16)(20 - 13)]}{(28 - 13)} \right] = 22 \mu\text{g}$$

| Methacholine Challenge Report |      |      |         |         |         |         |         |         |         |         |         |          |          |      |
|-------------------------------|------|------|---------|---------|---------|---------|---------|---------|---------|---------|---------|----------|----------|------|
|                               | Ref  | Pre  | Level 1 | Level 2 | Level 3 | Level 4 | Level 5 | Level 6 | Level 7 | Level 8 | Level 9 | Level 10 | Level 11 | Post |
| Conc                          |      |      | 0.03    | 0.06    | 0.125   | 0.25    | 0.5     |         |         |         |         |          |          |      |
| FEV1                          | 2.16 | 1.91 | 1.77    | 1.73    | 1.63    | 1.55    | 1.28    |         |         |         |         |          |          | 1.93 |
| % Cha                         |      | 8    | -0      | -2      | -8      | -13     | -28     |         |         |         |         |          |          | 9    |

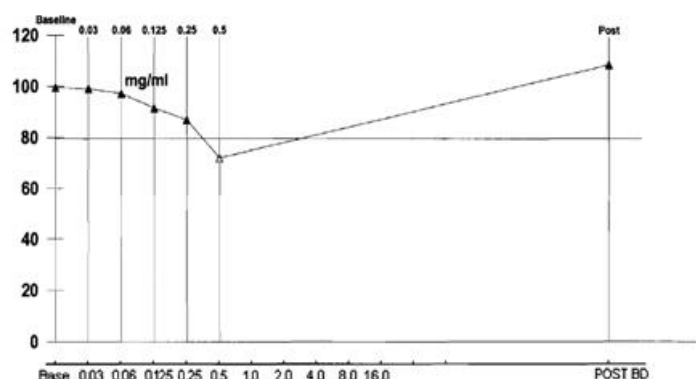

[1] Sterk PJ, Fabbri LM, Quanjer PH, *et al.* Airway responsiveness. Standardized challenge testing with pharmacological, physical and sensitizing stimuli in adults. *Eur Respir J* 1993; 6: Suppl. 16, 53–83.

[2] Juniper EF, Cockcroft DW, Hargreaves FE, *et al.* Histamine and Methacholine Inhalation Tests: Tidal Breathing Methods. Laboratory Procedure and Standardization. Lund, Astra Draco, 1994.

[3] Cockcroft DW, Murdock KY, Mink JJ. Determination of histamine PC20: comparison of linear and logarithmic interpolation. *Chest* 1983; 84: 505–506.

[4] Coates AL, Leung K, Dell SD. Developing alternative delivery systems for methacholine challenge tests. *J Aerosol Med Pulmon Drug Deliv* 2014; 27: 66–70.

[5] Verlato G, Cerveri A, Villani A, *et al.* Evaluation of methacholine dose-response curves by linear and exponential mathematical models: goodness-of-fit and validity of extrapolation. *Eur Respir J* 1996; 9: 506–511.
