# Supplementary material
Source: HighWire-hosted journal article supplement (https://erj.ersjournals.com/content/49/5/1601526)
Supplement: inline-supplementary-material-6 [file inline-supplementary-material-6.pdf]

## APPENDIX F:

### Sample Methacholine Challenge Report Format

Lab name, address, and phone number

Patient Name, ID number, date of birth, gender, height

Test Date, Technician/Respiratory Scientist initials

Indication for the test: (e.g., rule out asthma)

Test method: (e.g., 1-minute tidal breathing – state nebulizer or test system used)

Bronchodilator administered and dose

| Time | Test phase    | DOSE<br>mcg | FEV <sub>1</sub><br>(L) | Change FEV <sub>1</sub><br>(% of diluent) |
|------|---------------|-------------|-------------------------|-------------------------------------------|
| 9:00 | Pre challenge |             | 3.10                    |                                           |
| 9:10 | Post diluent  |             | 3.00                    | 100%                                      |
| 9:15 | 0.015 mg/mL   | 1.9         | 3.05                    | 102%                                      |
| 9:20 | 0.06 mg/mL    | 7.65        | 2.94                    | 98%                                       |
| 9:25 | 0.25 mg/mL    | 31.8        | 2.62                    | 87%                                       |
| 9:30 | 1.0 mg/mL     | 127         | 2.16                    | 72%                                       |
| 9:45 | BD recovery   |             | 3.20                    | 107%                                      |

Bronchial responsiveness: PD<sub>20</sub> = 61 µg

Display best flow-volume and/or volume-time curve from each step

Insert or attach a dose-response plot

Signs and symptoms after final dose:

Chest tightness, wheezing

Symptoms completely resolved after bronchodilator

Interpretation:

Test quality is acceptable; Mild bronchial hyperresponsiveness.

Medical director's signature
